# Supplementary material for: 3D microstructural characterization of Ni/yttria-stabilized zirconia electrodes during long-term CO2 electrolysis
Source: Royal Society of Chemistry journal article supplement (doi:10.1039/d3ta01503c), 2023-01-01
Supplement: d3ta01503c1.zip [file d3ta01503c1.zip]

Voxel size:

Cell_Ref: 25×25×35.92

Cell_0A: 25×25×34.14

Cell_1A: 25×25×40.74

Matrix information:

0 = Pore

1 = YSZ

2 = Ni
